# Supplementary material for: Development of a colorlessCentella asiatica(L.) Urb. extract using a natural deep eutectic solvent (NADES) and microwave-assisted extraction (MAE) optimized by response surface methodology
Source: Royal Society of Chemistry journal article supplement (doi:10.1039/d0ra09934a), 2021-01-01
Supplement: d0ra09934a1.pdf [file d0ra09934a1.pdf]

## SUPPORTING INFORMATION

Development of a colorless *Centella asiatica* (L.) Urb. extract using a natural deep eutectic solvent (NADES) and microwave-assisted extraction (MAE) optimized by response surface methodology

Suppalak Phaisan<sup>a</sup>, Fonthip Makkliang<sup>a</sup>, Waraporn Putalun<sup>b, c</sup>, Seiichi Sakamoto<sup>d</sup>, Gorawit Yusakul<sup>a\*</sup>

<sup>a</sup>School of Pharmacy, Walailak University, Thaiburi, Thasala, Nakhon Si Thammarat 80160, Thailand

<sup>b</sup>Faculty of Pharmaceutical Sciences, Khon Kaen University, Khon Kaen 40002, Thailand

<sup>c</sup>Research Group for Pharmaceutical Activities of Natural Products Using Pharmaceutical Biotechnology (PANPB), National Research University-Khon Kaen University, Khon Kaen 40002, Thailand

<sup>d</sup>Department of Pharmacognosy, Graduate School of Pharmaceutical Sciences, Kyushu University, Fukuoka 812-8582, Japan

\*Corresponding author: Gorawit Yusakul.

Tel: +66(0)75-67-2839, Email address: gorawit.yu@mail.wu.ac.th

### List of supporting information

1. *Centella asiatica* (L.) Urb. the material used for extraction experiments
2. HPLC-UV analysis
3. The color appearance of *Centella asiatica* (L.) Urb. extracts
4. The effect of extraction parameters on the yields

1. *Centella asiatica* (L.) Urb. the material used for extraction experiments

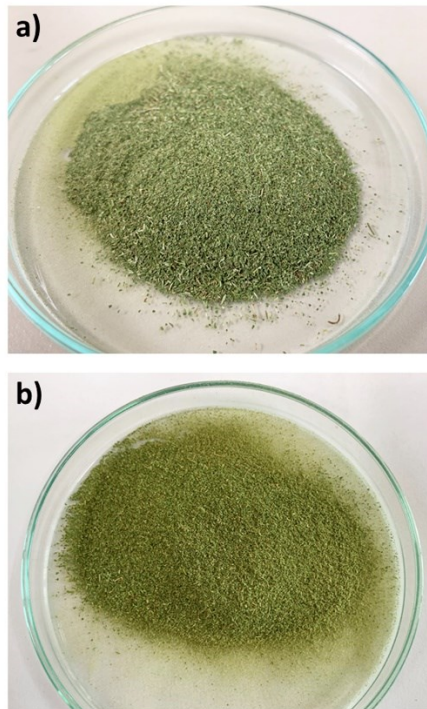

**Fig. S1** The appearance of ground *Centella asiatica* (L.) Urb. powder (a) and its sieved (0.5 mm) powder (b)

## 2. HPLC-UV analysis

The chromatograms of authentic MS and AS and extracts were demonstrated (Figure S2). The NADES (ACW60) was also analyzed to ensure that its composition does not interfere with the analysis.

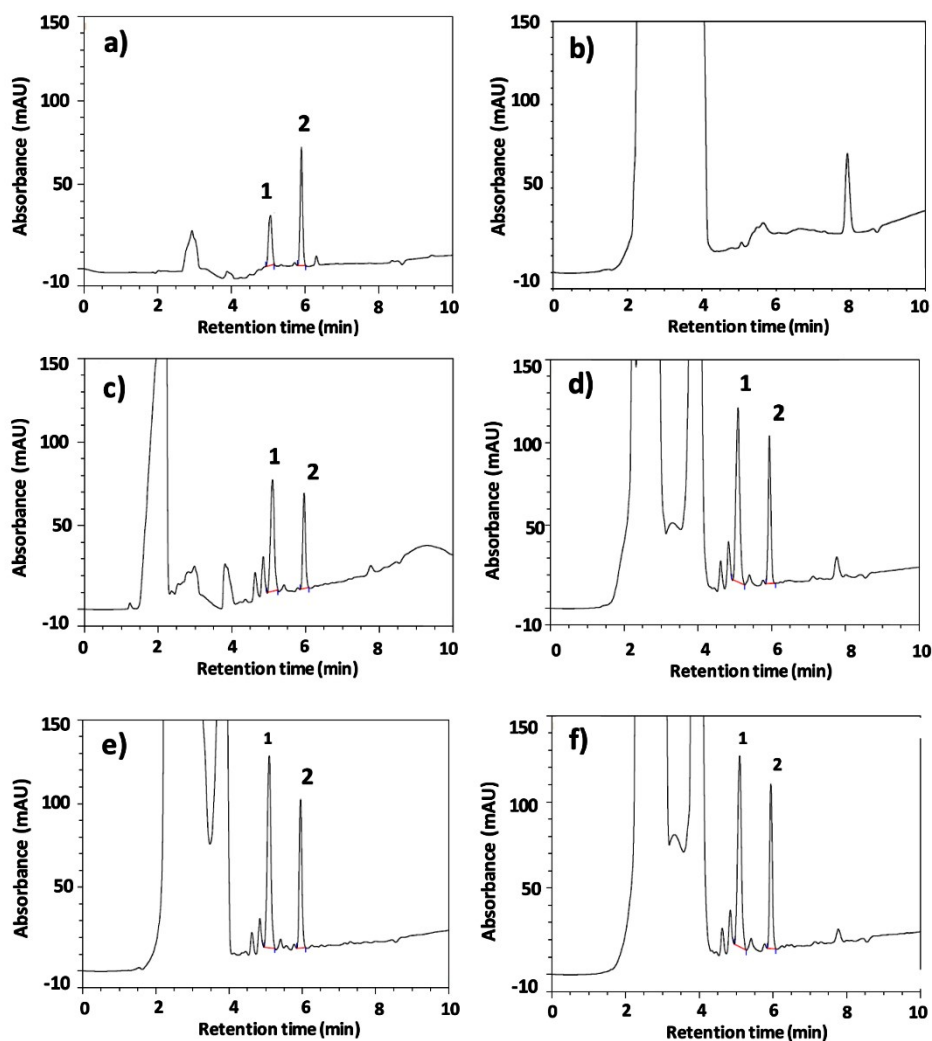

**Fig. S2** The HPLC chromatogram of standard MS and AS (a), indicated by **1** and **2**. The chromatogram of *Centella asiatica* free NADES (ACW60) was analyzed as well (b). The MS and AS peaks in the extracts prepared using 80% (v/v) EtOH, ACW60, AGW60, and AMW60 were showed c, d, e, and f, respectively.

The analytical recovery of the HPLC was validated for accuracy ensuring. *Centella asiatica* (L.) Urb. was extracted with AMW60 with MAE (30 s irradiation time, 300 W microwave power, and 0.1 g/20 mL LS ratio). The resultant extract was diluted in 80% ethanol, and then the authentic MS and AS were individually spiked for the final concentration of 5 and 20  $\mu\text{g}/\text{mL}$ . The concentration of MS

and AS in the spiked and non-spiked samples were determined. The recovery (%) was calculated using the following equation.

$$\text{Recovery (\%)} = \frac{\text{Concentration in spiked sample} - \text{Concentration in non-spiked samples}}{\text{theoretical concentration spiked}} \times 100$$

**Table S1** Recovery of MS and AS analysis using HPLC-UV method

| Theoretical concentration<br>spiked (µg/mL) | Measured concentration (µg/mL) |           | Recovery (%) |      |
|---------------------------------------------|--------------------------------|-----------|--------------|------|
|                                             | MS                             | AS        | MS           | AS   |
| 0                                           | 304±8.71                       | 189±8.33  | -            | -    |
| 5                                           | 308±0.486                      | 194±0.536 | 97.2         | 98.7 |
| 20                                          | 323±1.96                       | 208±1.88  | 99.0         | 94.8 |

### 3. Color appearance of *Centella asiatica* (L.) Urb. extracts

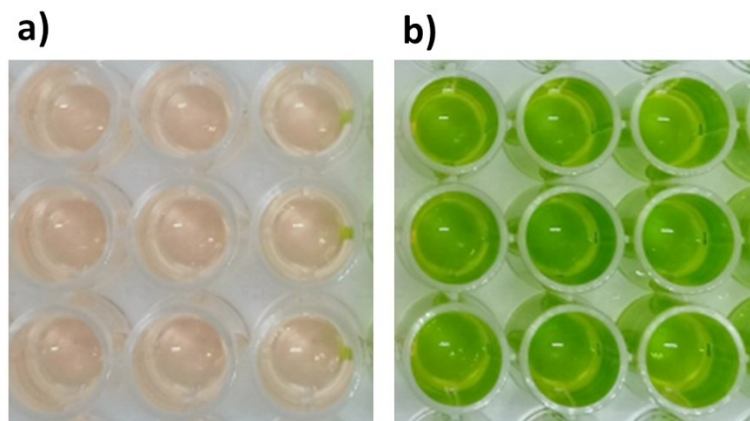

**Fig. S3** The appearance of extract using NADES (a) and 80% (v/v) ethanol (b) as solvents

#### 4. The effect of extraction parameters on the yields

**Table S2** The preliminary study of screening MAE parameters

| <b>Time (s)</b> | <b>Microwave power (W)</b> | <b>LS ratio (mL/g)</b> | <b>MS (mg/g dry weight)</b> | <b>AS (mg/g dry weight)</b> |
|-----------------|----------------------------|------------------------|-----------------------------|-----------------------------|
| 10              | 300                        | 10                     | 18.7±0.05                   | 10.9±0.04                   |
| 20              | 300                        | 10                     | 19.0±0.04                   | 11.2±0.05                   |
| 30              | 300                        | 10                     | 18.9±0.02                   | 11.2±0.01                   |
| 40              | 300                        | 10                     | 18.2±0.02                   | 10.7±0.02                   |
| 50              | 300                        | 10                     | 19.2±0.04                   | 11.3±0.01                   |
| 10              | 180                        | 10                     | 18.7±0.05                   | 10.9±0.04                   |
| 10              | 300                        | 10                     | 17.4±0.09                   | 10.1±0.01                   |
| 10              | 450                        | 10                     | 16.3±0.02                   | 9.53±0.00                   |
| 10              | 600                        | 10                     | 20.6±0.01                   | 11.9±0.02                   |
| 10              | 850                        | 10                     | 17.1±0.04                   | 10.0±0.01                   |
| 10              | 300                        | 20                     | 18.7±0.05                   | 10.9±0.04                   |
| 10              | 300                        | 30                     | 19.3±0.01                   | 11.3±0.02                   |
| 10              | 300                        | 40                     | 11.6±0.03                   | 6.89±0.00                   |
| 10              | 300                        | 50                     | 17.7±0.01                   | 10.4±0.01                   |
| 10              | 300                        | 60                     | 12.9±0.03                   | 7.50±0.03                   |
